# Supplementary material
Source: PubMed Central journal article supplement (PMC8120697)
Supplement: 12937_2021_701_MOESM1_ESM.pdf [file 12937_2021_701_MOESM1_ESM.pdf]

**Survey Instrument**

1. Currently, how do you describe yourself? You may select more than one.

- Female
- Male
- Transgender
- Gender fluid
- Other, please specify \_\_\_\_\_

2. What is your age? \_\_\_\_\_ Years

3. What is your race/ethnicity? You may select more than one.

- American Indian/Alaska Native
- Asian
- Black/African American
- Hispanic or Latino
- Native Hawaiian or Other Pacific Islander
- White
- Other, please specify \_\_\_\_\_

3. What year are you at UNM?

- Freshman
- Sophomore
- Junior
- Senior
- Graduate student
- Other (please specify): \_\_\_\_\_

| Over the last <b>two weeks (14 days)</b> , how often have you been bothered by the following problems? | Not at all | Several days | More than half the days | Nearly every day |
|--------------------------------------------------------------------------------------------------------|------------|--------------|-------------------------|------------------|
| 4. Feeling nervous, anxious, or on edge                                                                | 0          | 1            | 2                       | 3                |
| 5. Not being able to stop or control worrying                                                          | 0          | 1            | 2                       | 3                |
| 6. Worrying too much about different things                                                            | 0          | 1            | 2                       | 3                |
| 7. Trouble relaxing                                                                                    | 0          | 1            | 2                       | 3                |
| 8. Being so restless that it's hard to sit still                                                       | 0          | 1            | 2                       | 3                |
| 9. Becoming easily annoyed or irritable                                                                | 0          | 1            | 2                       | 3                |
| 10. Feeling afraid as if something awful might happen                                                  | 0          | 1            | 2                       | 3                |

11. If you checked off any problems, how difficult have these problems made it for you to do your work, take care of things at home, or get along with other people?

- \_\_\_\_\_ Not difficult at all  
\_\_\_\_\_ Somewhat difficult  
\_\_\_\_\_ Very difficult  
\_\_\_\_\_ Extremely difficult

For each statement, select the response that best matches how much you agree with the statement:

- |                                                                |                   |          |                            |       |                |
|----------------------------------------------------------------|-------------------|----------|----------------------------|-------|----------------|
| 12. I love food                                                | Strongly disagree | Disagree | Neither agree nor disagree | Agree | Strongly Agree |
| 13. I often decide that I don't like a food, before tasting it | Strongly disagree | Disagree | Neither agree nor disagree | Agree | Strongly Agree |
| 14. I enjoy eating                                             | Strongly disagree | Disagree | Neither agree nor disagree | Agree | Strongly Agree |
| 15. I look forward to mealtimes                                | Strongly disagree | Disagree | Neither agree nor disagree | Agree | Strongly Agree |
| 16. I eat more when I'm annoyed                                | Strongly disagree | Disagree | Neither agree nor disagree | Agree | Strongly Agree |
| 17. I often notice my stomach rumbling                         | Strongly disagree | Disagree | Neither agree nor disagree | Agree | Strongly Agree |
| 18. I refuse new foods at first                                | Strongly disagree | Disagree | Neither agree nor disagree | Agree | Strongly Agree |
| 19. I eat more when I'm worried                                | Strongly disagree | Disagree | Neither agree nor disagree | Agree | Strongly Agree |
| 20. If I miss a meal I get irritable                           | Strongly disagree | Disagree | Neither agree nor disagree | Agree | Strongly Agree |
| 21. I eat more when I am upset                                 | Strongly disagree | Disagree | Neither agree nor disagree | Agree | Strongly Agree |
| 22. I often leave food on my plate at the end of a meal        | Strongly disagree | Disagree | Neither agree nor disagree | Agree | Strongly Agree |
| 23. I enjoy tasting new foods                                  | Strongly disagree | Disagree | Neither agree nor disagree | Agree | Strongly Agree |
| 24. I often feel hungry when I am with someone who is eating   | Strongly disagree | Disagree | Neither agree nor disagree | Agree | Strongly Agree |
| 25. I often finish my meals quickly                            | Strongly disagree | Disagree | Neither agree nor disagree | Agree | Strongly Agree |
| 26. I eat less when I'm worried                                | Strongly disagree | Disagree | Neither agree nor disagree | Agree | Strongly Agree |
| 27. I eat more when I am anxious                               | Strongly disagree | Disagree | Neither agree nor disagree | Agree | Strongly Agree |
| 28. Given the choice, I would eat most of the time             | Strongly disagree | Disagree | Neither agree nor disagree | Agree | Strongly Agree |
| 29. I eat less when I'm angry                                  | Strongly disagree | Disagree | Neither agree nor disagree | Agree | Strongly Agree |

|                                                                    |                   |          |                            |       |                |
|--------------------------------------------------------------------|-------------------|----------|----------------------------|-------|----------------|
| 30. I am interested in tasting new food I haven't tasted before    | Strongly disagree | Disagree | Neither agree nor disagree | Agree | Strongly Agree |
| 31. I eat less when I'm upset                                      | Strongly disagree | Disagree | Neither agree nor disagree | Agree | Strongly Agree |
| 32. I eat more when I'm angry                                      | Strongly disagree | Disagree | Neither agree nor disagree | Agree | Strongly Agree |
| 33. I am always thinking about food                                | Strongly disagree | Disagree | Neither agree nor disagree | Agree | Strongly Agree |
| 34. I often get full before my meal is finished                    | Strongly disagree | Disagree | Neither agree nor disagree | Agree | Strongly Agree |
| 35. I enjoy a wide variety of foods                                | Strongly disagree | Disagree | Neither agree nor disagree | Agree | Strongly Agree |
| 36. I am often last finishing a meal                               | Strongly disagree | Disagree | Neither agree nor disagree | Agree | Strongly Agree |
| 37. I eat more and more slowly during the course of a meal         | Strongly disagree | Disagree | Neither agree nor disagree | Agree | Strongly Agree |
| 38. I eat less when I'm annoyed                                    | Strongly disagree | Disagree | Neither agree nor disagree | Agree | Strongly Agree |
| 39. I often feel so hungry that I have to eat something right away | Strongly disagree | Disagree | Neither agree nor disagree | Agree | Strongly Agree |
| 40. I eat slowly                                                   | Strongly disagree | Disagree | Neither agree nor disagree | Agree | Strongly Agree |
| 41. I can't eat a meal if I have had a snack just before           | Strongly disagree | Disagree | Neither agree nor disagree | Agree | Strongly Agree |
| 42. I get full easily                                              | Strongly disagree | Disagree | Neither agree nor disagree | Agree | Strongly Agree |
| 43. I often feel hungry                                            | Strongly disagree | Disagree | Neither agree nor disagree | Agree | Strongly Agree |
| 44. When I see or smell food that I like, it makes me want to eat  | Strongly disagree | Disagree | Neither agree nor disagree | Agree | Strongly Agree |
| 45. If my meals are delayed I get light-headed                     | Strongly disagree | Disagree | Neither agree nor disagree | Agree | Strongly Agree |
| 46. I eat less when I'm anxious                                    | Strongly disagree | Disagree | Neither agree nor disagree | Agree | Strongly Agree |
